# Supplementary material for: N6-Methyladenosine METTL3 Modulates the Proliferation and Apoptosis of Lens Epithelial Cells in Diabetic Cataract
Source: PubMed Central journal article supplement — Mol Ther Nucleic Acids. 2020 Feb 11;20:111–6. doi: 10.1016/j.omtn.2020.02.002 (PMC7066033; doi:10.1016/j.omtn.2020.02.002), 2020-02-11
Supplement: mmc1.pdf [file mmc1.pdf]

OMTN, Volume 20

## **Supplemental Information**

### **N<sup>6</sup>-Methyladenosine METTL3 Modulates the Proliferation and Apoptosis of Lens Epithelial Cells in Diabetic Cataract**

**Jun Yang, Jingshu Liu, Shaozhen Zhao, and Fang Tian**

**Table S1.** Primers sequences for qRT-PCR and shRNA.

|             | Sequences 5'-3'                                                                  |
|-------------|----------------------------------------------------------------------------------|
| METTL3      | forward 5'-CTATCTCCTGGCACTCGCAAGA-3'<br>reverse 5'-GCTTGAACCGTGCAACCACATC-3'     |
| ICAM-1      | forward, 5'-ACACACAGGTGGGACACAAA-3'<br>reverse, 5'-AGGCTCCAAGGATCACGAC-3'        |
| GAPDH       | forward, 5'-GGAGCGAGATCCCTCCAAAAT -3'<br>reverse, 5'-GGCTGTTGTCATACTTCTCATGG -3' |
| sh-METTL3-1 | 5'-ACCAAGTTTATCGCCTTACG-3'                                                       |
| sh-METTL3-2 | 5'-ACTCAAGGGTATGCTACTAT-3'                                                       |
| sh-METTL3-3 | 5'-GGGTTGGCTGCATTACACCC-3'                                                       |
